# Supplementary material for: IVS I-5 (G &gt; C) is associated with changes to the RBC membrane lipidome in response to hydroxyurea treatment in β-thalassemia patients
Source: Royal Society of Chemistry journal article supplement (doi:10.1039/d2mo00008c), 2022-04-22
Supplement: d2mo00008c1.pdf [file d2mo00008c1.pdf]

Please use files  
tab to view ESI  
tables.
