# Supplementary material for: IVS I-5 (G &gt; C) is associated with changes to the RBC membrane lipidome in response to hydroxyurea treatment in β-thalassemia patients
Source: Royal Society of Chemistry journal article supplement (doi:10.1039/d2mo00008c), 2022-04-22
Supplement: d2mo00008c3.pdf [file d2mo00008c3.pdf]

## Supplementary Material

### **IVS I-5 (G>C) is associated with changes to RBC membrane lipidome in response to Hydroxyurea treatment in $\beta$ -thalassemia patients**

Muhammad Behroz Naeem Khan<sup>a</sup>, Fizza Iftikhar<sup>a</sup>, Taj Wali Khan<sup>a</sup>, Asma Danish<sup>c</sup>, Tahir Shamsi<sup>c</sup>, Syed Ghulam Musharraf<sup>a,b</sup>, Amna Jabbar Siddiqui<sup>a\*</sup>

*<sup>a</sup>Dr. Panjwani Center for Molecular Medicine and Drug Research, International Center for Chemical and Biological Sciences, University of Karachi, Karachi-75270, Pakistan*

*<sup>b</sup>H.E.J. Research Institute of Chemistry, International Center for Chemical and Biological Sciences, University of Karachi, Karachi-75270, Pakistan.*

*<sup>c</sup>National Institute of Blood Disorders, Karachi, Pakistan.*

\* Corresponding author. Tel.: +92 21 34824924-5; 34819010; fax: + 92 21 34819018-9.

*E-mail address*

[jabbar\\_siddiqui08@yahoo.com](mailto:jabbar_siddiqui08@yahoo.com); [amna.jabbar@iccs.edu](mailto:amna.jabbar@iccs.edu)

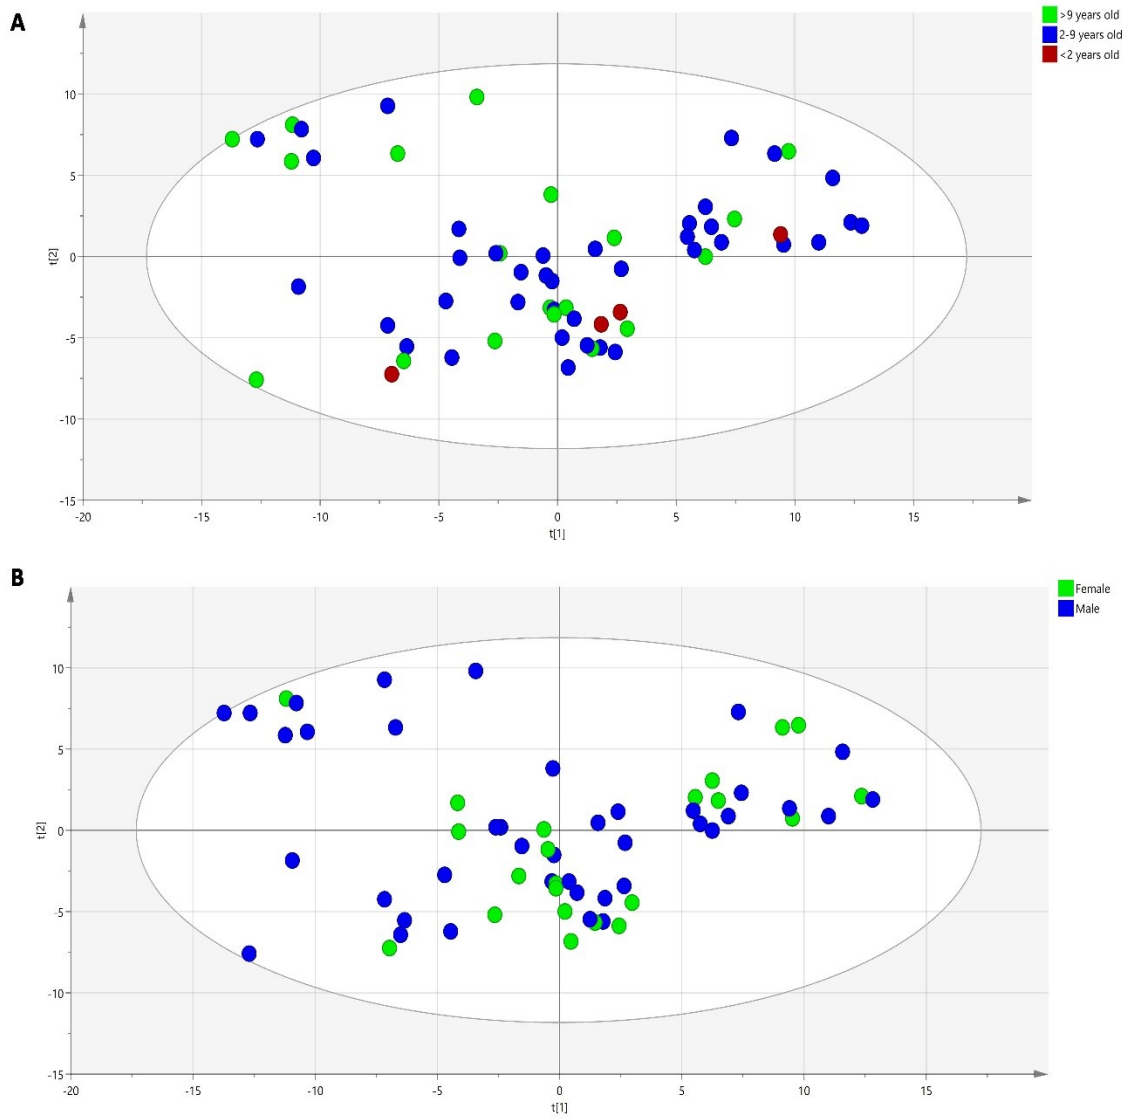

**Supplementary Figure 1.** PCA score plots based on (A) age brackets and (B) Gender. The plots do not show any prominent changes based on the gender and age of the patients.

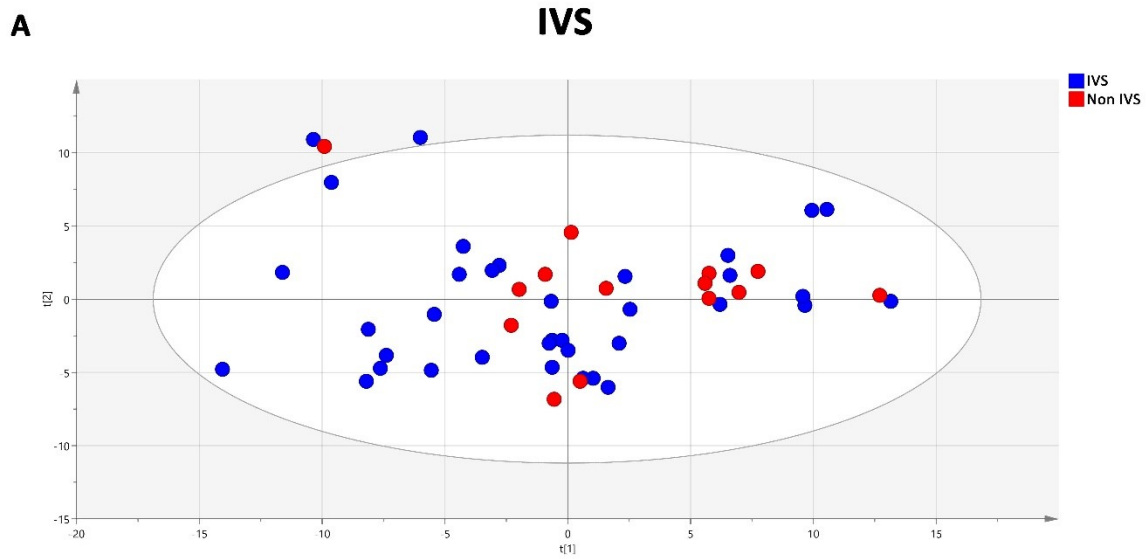

**Supplementary Figure 2** PCA score plots of IVS and Non IVS patients showing variability among the samples.

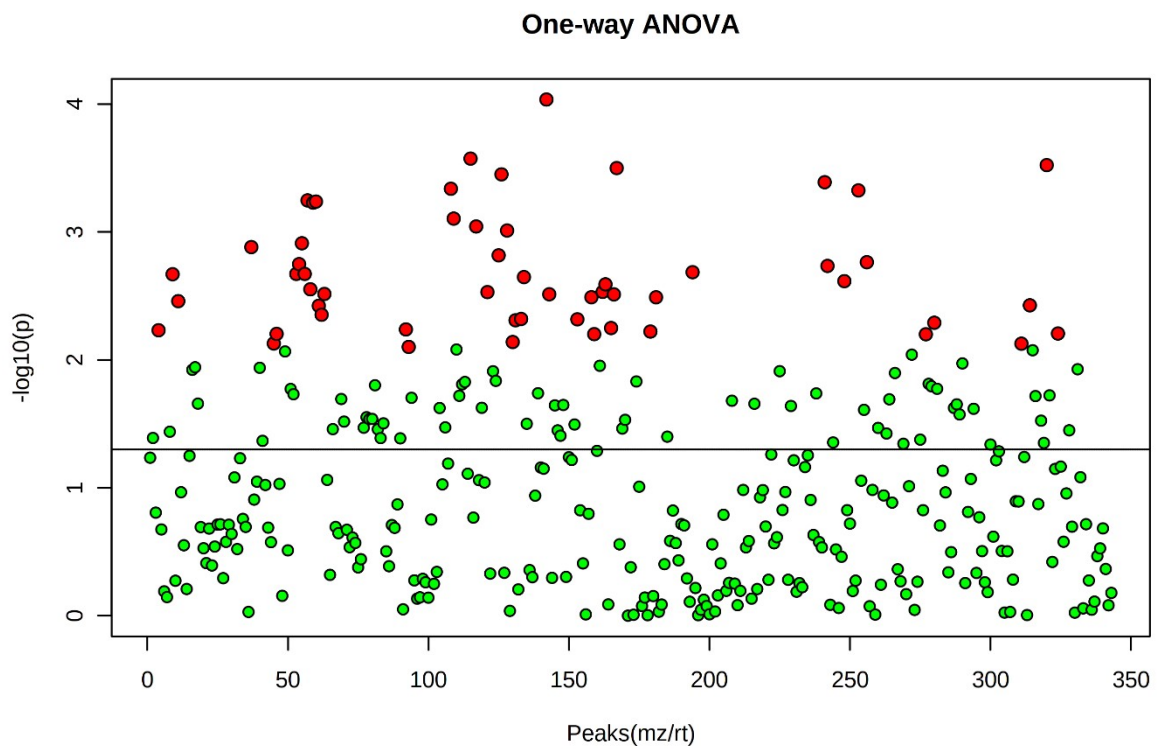

**Supplementary Figure 3:** Analysis of variance (ANOVA) of patients grouped into four groups (IVS+HU, IVS+non-HU, non-IVS+HU, non-IVS+non-HU).

**Supplementary Table 1:** Sequence of primers used for the detection of  $\beta$ -thalassemia mutation in multiplex ARMS (MARMS). Common C is the forward primer for all the mentioned Sequences, except for the 619 mutation (Both F and R seq. are mentioned in table). The internal control primers were A and B which amplify an 861 bp fragment from the 3' end of the  $\beta$ -globin gene.

| <b>Common Primers</b> | <b>Sequence (5' → 3')</b>                   | <b>Product Size</b> |
|-----------------------|---------------------------------------------|---------------------|
| Control A             | CAA TGT ATC ATG CCT CTT TGC ACC             | 861                 |
| Control B             | GAG TCA AGG CTG AGA GAT GCA GGA TA          |                     |
| Common C              | TCA CTT AGA CCT CAC CCT GTG GAG CCA C       | 493                 |
| <b>Mutant</b>         |                                             |                     |
| <b>Primers</b>        | <b>Sequence (5' → 3')</b>                   | <b>Product Size</b> |
| IVSI-5 (G-C)          | CTC CTT AAA CCT GTC TTG TAA CCT TGA TAG     | 319                 |
| FSC 8-9               | CCT TGC CCC ACA GGG CAG TAA CGG CAC ACC     | 250                 |
| Cap site + 1 (A-C)    | AAA AGT CAG GGC AGA GCC ATC TAT TGG TTC     | 281                 |
| Cd 41/42              | GAG TGG ACA GAT CCC CAA AGG ACC AAC CT      | 476                 |
| 257:619r              | TTT GGA TCC TTA TGG TGT AAG ACA AGG GTC TGA | 594                 |
| 579:619f              | CAC AGT CTG CCT AGT ACA T                   |                     |
| Fr41-42 (-TCTT)       | GAG TGG ACA GAT CCC CAA AGG ACT CAA CCT     | 439                 |
| IVSI-1(G-T)           | TTA AAC CTG TCT TGT AAC CTT GAT ACG AAA     | 315                 |
| IVSI-1(G-A)           | TTA AAC CTG TCT TGT AAC CTT GAT ACC AAT     | 305                 |
| Cd 15 Mt              | CAC CAA CTT CAT CCA CGT TCA CCT TGG CCT     | 276                 |

**Supplementary Table 2:** Significantly altered lipids in patients grouped on the basis of homozygous and heterozygous mutation.

| <b>Lipid</b>              | <b>p.value</b> | <b>m/z</b> | <b>ppm</b> | <b>Exact Mass</b> |
|---------------------------|----------------|------------|------------|-------------------|
| N-eicosanoyl-ethanolamine | 0.000116       | 338.3417   | 0          | 355.345           |
| Undecenoic acid; C11:1    | 0.000126       | 202.1801   | 0.494608   | 184.1463          |
| DG(20:4_22:1)             | 0.000212       | 699.5922   | 3.573498   | 698.5849          |
| PG(O-18:0/12:0)           | 0.000449       | 698.533    | 10.30721   | 680.4992          |
| Tetranor-PGE1             | 0.00058        | 316.2118   | 0          | 298.178           |
| PA(O-20:0_0:0)            | 0.000901       | 435.3234   | -4.82402   | 452.3267          |
| N-stearoyl valine         | 0.001169       | 384.3472   | 0.520363   | 383.3399          |
| PS(P-16:0/18:0)           | 0.001457       | 748.5487   | -3.74059   | 747.5414          |
| LPG(O-18:0)               | 0.001646       | 521.3214   | -11.893    | 498.3322          |
| LysoSM(d17:1)             | 0.002642       | 473.3115   | 13.09902   | 450.3223          |
